# Supplementary material
Source: PubMed Central journal article supplement (PMC1189297)

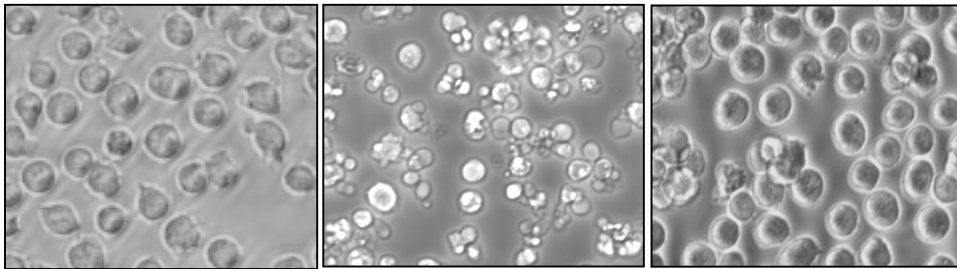

Supplement: pnas_0406731102_1.pdf [file pnas_0406731102_1.pdf]

**A**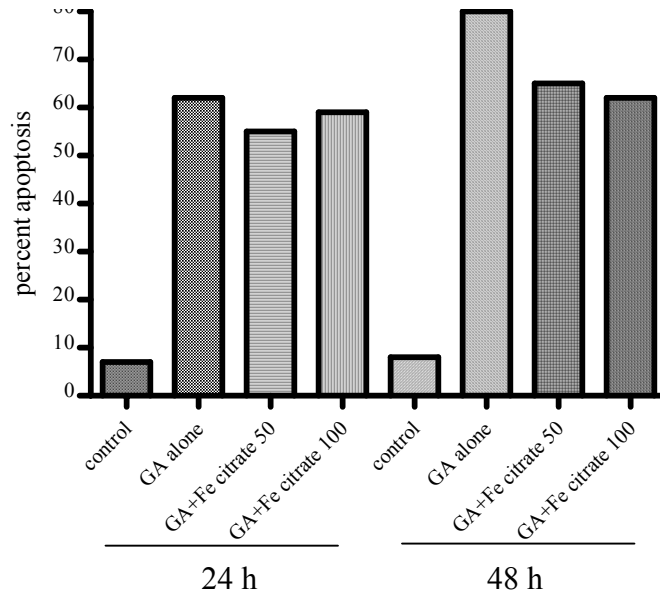**B**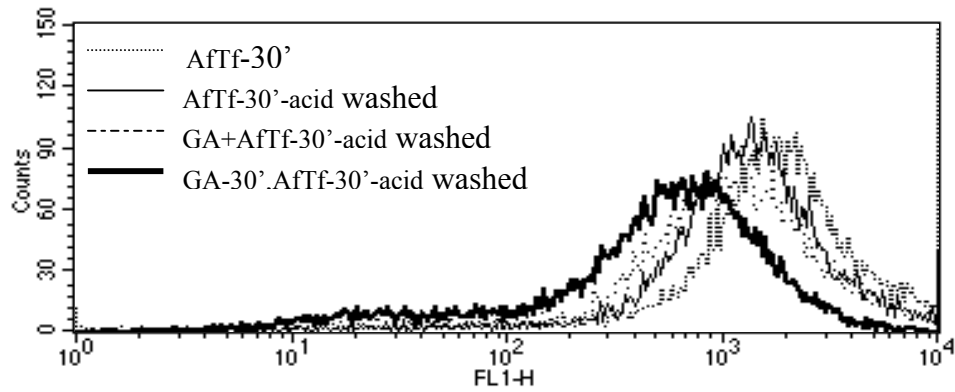**C**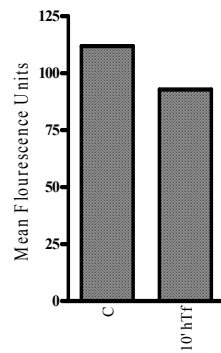

Supplement: pnas_0406731102_2.pdf [file pnas_0406731102_2.pdf]

**A**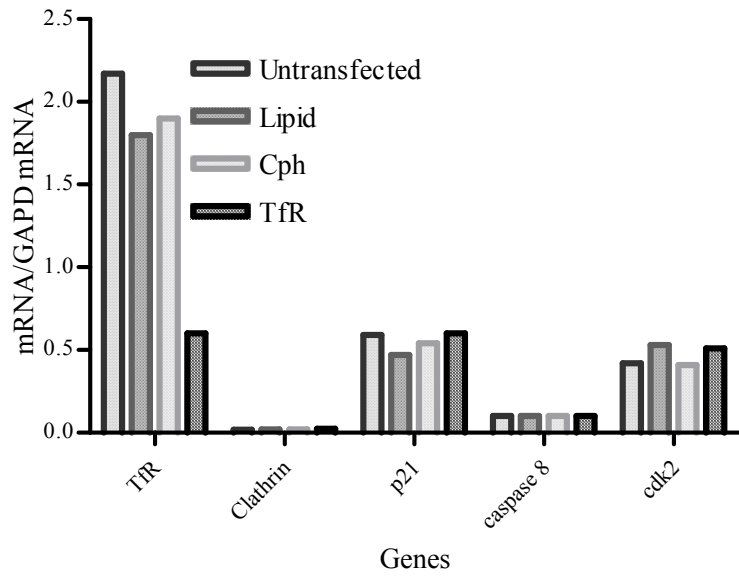**B**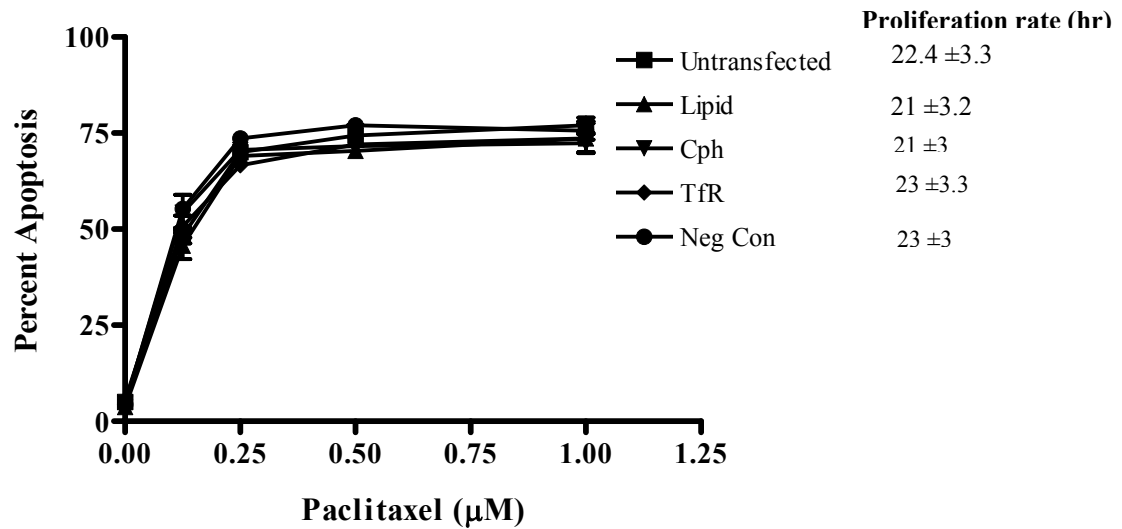

Supplement: pnas_0406731102_3.pdf [file pnas_0406731102_3.pdf]

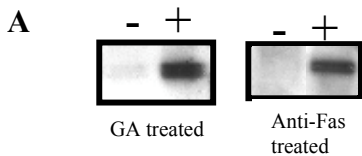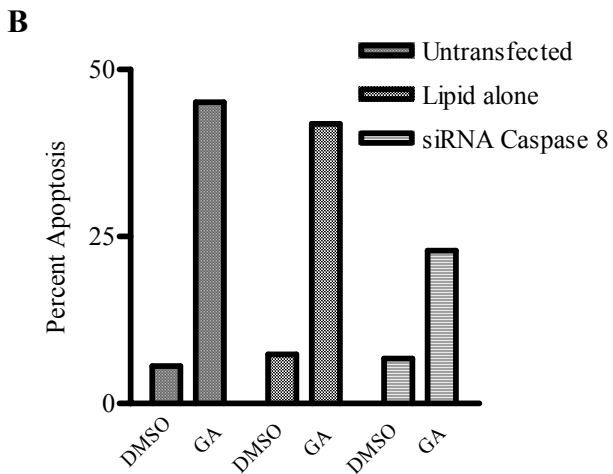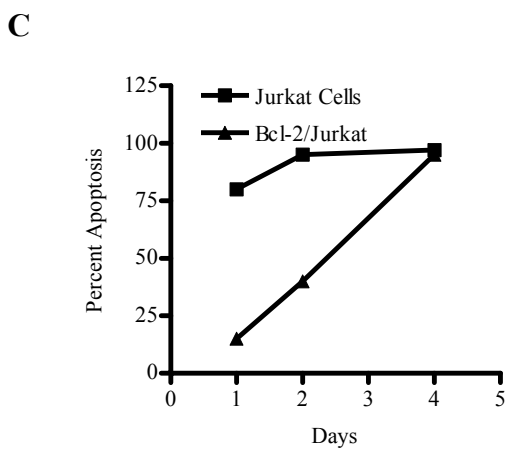

Supplement: pnas_0406731102_4.pdf [file pnas_0406731102_4.pdf]
